# Supplementary material
Source: publisher figshare collection journal article supplement (https://springernature.figshare.com/ndownloader/files/21416673)

Distance

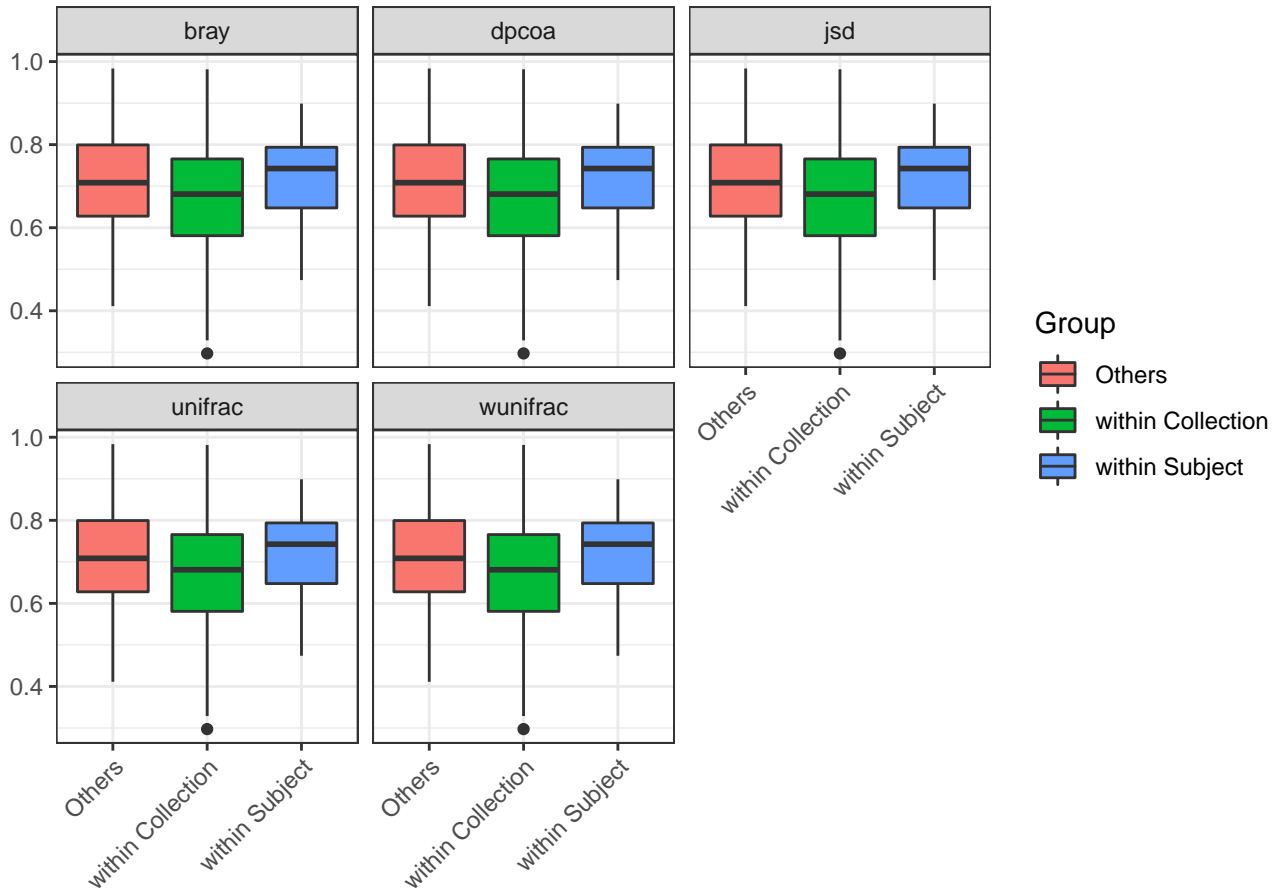

Supplement: Supplementary file [file 21416673]
